# Supplementary material
Source: PubMed Central journal article supplement (PMC6629038)
Supplement: NIHMS1033086-supplement-1.pdf [file NIHMS1033086-supplement-1.pdf]

## Supporting Online Material for “Recent Advances in the Cellular and Molecular Understanding of Myelodysplastic Syndromes: Implications for New Therapeutic Approaches”

This eTable accompanies a review article by Andrew M. Brunner, MD, and David P. Steensma, MD, in the January 2018 issue of *Clinical Advances in Hematology & Oncology*.

**eTable.** Emerging Therapies in Myelodysplastic Syndromes<sup>a</sup>

| Drug Classes and Drugs                                             | Mechanism of Action                                                                                                                             | Identifier                                |
|--------------------------------------------------------------------|-------------------------------------------------------------------------------------------------------------------------------------------------|-------------------------------------------|
| <b>Kinase inhibitors</b>                                           |                                                                                                                                                 |                                           |
| LGH447                                                             | Pim kinase inhibitor                                                                                                                            | NCT02078609                               |
| Quizartinib (AC220)                                                | FLT3 inhibitor                                                                                                                                  | NCT02272478                               |
| Rigosertib (SyB C-1101, SyB L-1101, ON 01910.Na)                   | Inhibits PLK1, RAS mimetic that inhibits PI3K family, RAS/MEK/ERK signaling                                                                     | NCT01926587<br>NCT02562443                |
| Ruxolitinib (INCB18424)                                            | JAK inhibitor                                                                                                                                   | NCT01787487                               |
| Sorafenib                                                          | Inhibition of Raf, VEGFR, PDGFR, FLT3, and other kinases                                                                                        | NCT02196857<br>NCT02728050<br>NCT02530476 |
| Tipifarnib                                                         | Nonpeptidomimetic quinolinone that binds to and inhibits the enzyme farnesyl protein transferase, preventing the activation of <i>RAS</i> genes | NCT02779777                               |
| TEW-7197                                                           | ALK5 inhibitor that inhibits the activity of TGFBR1 and prevents TGF- $\beta$ /TGFBR1-mediated signaling                                        | NCT03074006                               |
| ONC201                                                             | Akt/ERK inhibitor, blocks PI3K/MAPK/ERK signaling                                                                                               | NCT02392572                               |
| Ibrutinib                                                          | Small molecular inhibitor of BTK                                                                                                                | NCT02553941                               |
| sEphB4-HAS                                                         | sEphB4 fused to HSA                                                                                                                             | NCT03146871                               |
| OTS167                                                             | Inhibitor of MELK, a serine/threonine kinase involved in survival                                                                               | NCT02795520                               |
| BGB324                                                             | Inhibitor of AXL receptor tyrosine kinase, enhances chemosensitivity                                                                            | NCT02488408                               |
| Regorafenib                                                        | Inhibits VEGFR2/3, Ret, Kit, PDGFR, Raf kinase                                                                                                  | NCT03042689                               |
| DCC-3014                                                           | Inhibitor of the tyrosine kinase receptor CSF1R                                                                                                 | NCT03069469                               |
| INCB053914                                                         | Pim kinase inhibitor                                                                                                                            | NCT02587598                               |
| <b>Deacetylase inhibitors and DNA methyltransferase inhibitors</b> |                                                                                                                                                 |                                           |
| Oral azacitidine (CC-486)                                          | DNA methyltransferase inhibitor                                                                                                                 | NCT02281084<br>NCT02223052                |
| Guadecitabine (SGI-110)                                            | Nucleoside analogue with DNA methyltransferase inhibitory activity                                                                              | NCT02907359<br>NCT02935361                |
| Panobinostat (LBH-589)                                             | Deacetylase inhibitor                                                                                                                           | NCT02676323                               |
| Pracinostat (SB939)                                                | Deacetylase inhibitor                                                                                                                           | NCT03151304                               |
| Entinostat (SNDX-275)                                              | Deacetylase inhibitor                                                                                                                           | NCT02936752                               |
| GSK2879552                                                         | LSD1 inhibitor, enhances H3K4 methylation                                                                                                       | NCT02929498                               |
| Tranylcypromine sulfate                                            | LSD1 inhibitor, enhances H3K4 methylation                                                                                                       | NCT02717884<br>NCT02273102                |
| IMG-7289                                                           | LSD1 inhibitor, enhances H3K4 methylation                                                                                                       | NCT02842827                               |
| ASTX727                                                            | DNA methyltransferase inhibitor (decitabine) combined with cytidine deaminase inhibitor (E7727)                                                 | NCT02103478                               |
| <b>Drugs that alter cell metabolism</b>                            |                                                                                                                                                 |                                           |
| Enasidenib (AG-221) and ivosidenib (AG-120)                        | Small-molecule inhibitors of mutant <i>IDH1</i> (AG-120) and <i>IDH2</i> (AG-221)                                                               | NCT02577406<br>NCT03173248                |

(Table continued on next page)

**eTable.** (Continued) Emerging Therapies in Myelodysplastic Syndromes<sup>a</sup>

| Drug Classes and Drugs                                          | Mechanism of Action                                                                           | Identifier                                                                             |
|-----------------------------------------------------------------|-----------------------------------------------------------------------------------------------|----------------------------------------------------------------------------------------|
| <b>Drugs that alter cell metabolism (Continued)</b>             |                                                                                               |                                                                                        |
| CPI-613 (6, 8-bis[benzylthio] octanoic acid)                    | Inhibitor of pyruvate dehydrogenase and ketoglutarate dehydrogenase                           | NCT01902381                                                                            |
| CB-839                                                          | Glutaminase inhibitor                                                                         | NCT03047993                                                                            |
| AEB1102                                                         | Co-Argl-PEG–modified human arginase 1; degrades arginine levels                               | NCT02732184                                                                            |
| Tosedostat (CHR-2797)                                           | Inhibits M1 family of aminopeptidases, resulting in amino acid deprivation                    | NCT02452346                                                                            |
| <b>Cytotoxic agents/cell cycle inhibitors</b>                   |                                                                                               |                                                                                        |
| Cladribine (2-CDA)                                              | Nucleoside analogue                                                                           | NCT02115295<br>NCT01515527<br>NCT02044796<br>NCT02921061<br>NCT02728050<br>NCT02272478 |
| Cytarabine/daunorubicin liposome injection (CPX-351)            | Liposomal daunorubicin and cytarabine in a fixed 1:5 ratio                                    | NCT02533115                                                                            |
| Vosaroxin (SNS-595)                                             | Quinolone derivative; replication-dependent DNA damage agent                                  | NCT02658487                                                                            |
| CFI-400945 fumarate                                             | PLK4 inhibitor, disrupts mitosis and cell division                                            | NCT03187288                                                                            |
| AZD2811                                                         | AURKB inhibitor; disrupts mitosis and cell division                                           | NCT03217838                                                                            |
| OXi4503 (combretastatin A1 diphosphate)                         | Promotes microtubule depolymerization, mitotic arrest; disrupts tumor blood flow              | NCT02576301                                                                            |
| FF-10501-01 (inosine 5'-mono-phosphate dehydrogenase inhibitor) | Inhibits synthesis of guanine nucleotides and GTP; disrupts DNA and RNA synthesis             | NCT02193958                                                                            |
| AZD4573                                                         | CDK9 inhibitor                                                                                | NCT03263637                                                                            |
| <b>Cell surface marker-directed therapies</b>                   |                                                                                               |                                                                                        |
| Daratumumab                                                     | Anti-CD38 human monoclonal antibody                                                           | NCT03067571<br>NCT03011034                                                             |
| BI 836858                                                       | Anti-CD33 human monoclonal antibody                                                           | NCT02240706                                                                            |
| OPN-305                                                         | Anti-TLR2 humanized IgG4 monoclonal antibody                                                  | NCT02363491                                                                            |
| Talacotuzumab (CSL362)                                          | Anti-CD123 (IL3RA) antibody                                                                   | NCT03011034                                                                            |
| SL-401                                                          | Recombinant protein consisting of human IL3 fused to diphtheria toxin, binds to IL3RA (CD123) | NCT03113643                                                                            |
| CC-90002                                                        | Anti-CD47 monoclonal antibody                                                                 | NCT02641002<br>NCT02367196                                                             |
| Hu5F9-G4                                                        | Anti-CD47 monoclonal antibody                                                                 | NCT03248479<br>NCT02678338                                                             |
| Hu8F4                                                           | Antibody against PR1/HLA-A2 (epitope expressed on leukemic blasts)                            | NCT02530034                                                                            |
| TTI-621                                                         | Antibody fusion protein of the CD47 binding domain linked to human IgG1                       | NCT02663518                                                                            |
| Gemtuzumab ozogamicin                                           | Anti-CD33 antibody conjugated to a cytotoxin                                                  | NCT02221310<br>NCT02117297<br>NCT02272478                                              |
| <b>Immunosuppressive and immunomodulatory agents</b>            |                                                                                               |                                                                                        |
| ALT-803                                                         | IL-15 superagonist mutant and a dimeric IL-15 receptor $\alpha$ Su/Fc fusion protein          | NCT02989844<br>NCT01898793<br>NCT01885897                                              |

(Table continued on next page)

**eTable.** (Continued) Emerging Therapies in Myelodysplastic Syndromes<sup>a</sup>

| Drug Classes and Drugs                                           | Mechanism of Action                                                                                                                                       | Identifier                                                                             |
|------------------------------------------------------------------|-----------------------------------------------------------------------------------------------------------------------------------------------------------|----------------------------------------------------------------------------------------|
| <b>Immunosuppressive and immunomodulatory agents (Continued)</b> |                                                                                                                                                           |                                                                                        |
| Equine anti-thymocyte globulin                                   | T-cell inhibition by polyclonal antibodies raised in animals                                                                                              | NCT01624805<br>NCT02462252                                                             |
| Ipilimumab (MDX-101)                                             | CTLA-4 inhibitor                                                                                                                                          | NCT02530463<br>NCT02890329<br>NCT01822509                                              |
| Pembrolizumab (MK-3475)                                          | Anti-PD-1 antibody                                                                                                                                        | NCT03094637<br>NCT02936752                                                             |
| Durvalumab (MEDI4736)                                            | Anti-PD-L1 antibody                                                                                                                                       | NCT02775903<br>NCT02117219<br>NCT02281084                                              |
| Atezolizumab (MPDL3280A)                                         | Anti-PD-L1 antibody                                                                                                                                       | NCT02508870<br>NCT02935361                                                             |
| Nivolumab (BMS-936558)                                           | Anti-PD-1 antibody                                                                                                                                        | NCT02530463<br>NCT02599649<br>NCT02464657<br>NCT03259516<br>NCT03092674<br>NCT01822509 |
| Pomalidomide (CC4047)                                            | Immunomodulatory agent; modulates cereblon E3 ubiquitin ligase activity                                                                                   | NCT02029950                                                                            |
| Sirolimus                                                        | mTOR inhibitor                                                                                                                                            | NCT01869114                                                                            |
| Lirilumab (BMS-986015)                                           | Antibody against KIRs, activating NK cells                                                                                                                | NCT02599649<br>NCT02399917                                                             |
| PDR001                                                           | Anti-PD-1 antibody                                                                                                                                        | NCT03066648                                                                            |
| MBG453                                                           | Anti-TIM-3 antibody                                                                                                                                       | NCT03066648                                                                            |
| ARGX-110                                                         | Antibody against CD70, which is the ligand for the costimulatory receptor CD27                                                                            | NCT03030612                                                                            |
| <b>Apoptosis modulation</b>                                      |                                                                                                                                                           |                                                                                        |
| Luspatercept (ACE-536)                                           | Modified activin receptor IIB-IgG Fc fusion protein that targets TGF- $\beta$ signaling via Smad2/3 and GDF-11                                            | NCT02268383<br>NCT01749514                                                             |
| Venetoclax (ABT-199)                                             | BH3 mimetic that inhibits Bcl-2                                                                                                                           | NCT02942290<br>NCT02966782                                                             |
| LY2606368                                                        | CHK1 inhibitor; interferes with DNA repair and cell cycle checkpoint control                                                                              | NCT02649764                                                                            |
| ALRN-6924                                                        | MDM2/MDMX inhibitor; restores p53 activity                                                                                                                | NCT02909972                                                                            |
| AZD1775                                                          | WEE1 inhibitor; impairs G2 DNA damage checkpoint                                                                                                          | NCT02666950                                                                            |
| S 64315 (MIK665)                                                 | Inhibitor of Mcl-1                                                                                                                                        | NCT02979366                                                                            |
| S 055746                                                         | Inhibitor of Bcl-2                                                                                                                                        | NCT02920541                                                                            |
| DS-3032b                                                         | MDM2 antagonist; inhibits p53 degradation                                                                                                                 | NCT02319369                                                                            |
| APR-246                                                          | PRIMA-1 analogue; restores wild-type function to mutant p53                                                                                               |                                                                                        |
| <b>Vaccines and cellular therapies (excluding transplant)</b>    |                                                                                                                                                           |                                                                                        |
| Cellular immunotherapy                                           | Autologous dendritic cells that have undergone electroporation with WT1 mRNA                                                                              | NCT03083054                                                                            |
| DSP-7888                                                         | WT1 protein-derived peptide vaccine                                                                                                                       | NCT02498665<br>NCT02436252                                                             |
| BPX-701                                                          | Autologous T cells genetically modified to express $\alpha/\beta$ T-cell receptor reacting with PRAME peptide/HLA*A2.01 and containing the suicide switch | NCT02743611                                                                            |

(Table continued on next page)

**eTable.** (Continued) Emerging Therapies in Myelodysplastic Syndromes<sup>a</sup>

| Drug Classes and Drugs                                                    | Mechanism of Action                                                                                                                              | Identifier                                               |
|---------------------------------------------------------------------------|--------------------------------------------------------------------------------------------------------------------------------------------------|----------------------------------------------------------|
| <b>Vaccines and cellular therapies (excluding transplant) (Continued)</b> |                                                                                                                                                  |                                                          |
| CD16/IL-15/CD33 tri-specific killer engagers (TriKes)                     | Cellular therapy directed toward CD33+ malignancies                                                                                              | NCT03214666                                              |
| CAR-T cells                                                               | CAR T cells directed toward several targets, including CD33, CD39, CD56, CD117, CD123, CD34, and MUC1                                            | NCT03291444<br>NCT03018405                               |
| <b>Growth factors</b>                                                     |                                                                                                                                                  |                                                          |
| Eltrombopag                                                               | Small molecule agonist of TPO receptor c-Mpl (ie, thrombopoiesis-stimulating agent)                                                              | NCT02912208<br>NCT02928419<br>NCT01772420<br>NCT02446145 |
| Romiplostim                                                               | Recombinant mimetic of TPO                                                                                                                       | NCT02335268                                              |
| Epoetin beta                                                              | Recombinant protein similar to human EPO                                                                                                         | NCT02145026                                              |
| Pegol sifematide                                                          | Synthetic EPO peptide linked to PEG to increase circulation time                                                                                 | NCT02619097                                              |
| <b>Drugs that regulate transcription</b>                                  |                                                                                                                                                  |                                                          |
| GSK525762                                                                 | BET family inhibitor                                                                                                                             | NCT01943851                                              |
| TEN-010 (RO6870810)                                                       | BET family inhibitor                                                                                                                             | NCT02308761                                              |
| FT-1101                                                                   | BET family inhibitor                                                                                                                             | NCT02543879                                              |
| INCB057643                                                                | BET family inhibitor                                                                                                                             | NCT02711137                                              |
| CPI-0610                                                                  | BET family inhibitor                                                                                                                             | NCT02158858                                              |
| PLX51107                                                                  | BRD4 inhibitor, part of the BET family                                                                                                           | NCT02683395                                              |
| <b>Miscellaneous</b>                                                      |                                                                                                                                                  |                                                          |
| H3B-8800                                                                  | Orally bioavailable splicing factor modulator targeting SF3B1                                                                                    | NCT02841540                                              |
| Bortezomib                                                                | Proteasome inhibition                                                                                                                            | NCT02312102<br>NCT02211755                               |
| Ganetespib (STA-9090)                                                     | Hsp90 inhibitor                                                                                                                                  | NCT02272478                                              |
| Omacetaxine mepesuccinate (homoharringtonine)                             | Protein translation inhibitor                                                                                                                    | NCT02159872                                              |
| BL-8040                                                                   | Inhibition of CXCR4                                                                                                                              | NCT02462252                                              |
| CX-01 (2-0, 3-0 desulfated heparin)                                       | Binds SDF-1 and CXCR4, as well as platelet factor 4                                                                                              | NCT02995655                                              |
| Sertraline                                                                | Selective serotonin reuptake inhibitor, inflammatory cytokine modulator                                                                          | NCT02452983                                              |
| Selinexor (SINE KPT-330)                                                  | SINE that restores tumor-suppressing processes                                                                                                   |                                                          |
| KPT-8602                                                                  | Inhibitor of XPO-1 (SINE) that restores tumor-suppressing processes                                                                              | NCT02228525<br>NCT02485535                               |
| Tamibarotene (SY-1425)                                                    | Orally active synthetic retinoid, approximately 10 times more potent than ATRA                                                                   | NCT02807558                                              |
| IRX5183                                                                   | Retinoic acid receptor alpha agonist                                                                                                             | NCT02749708                                              |
| 765IGF-MTX                                                                | IGF-1 conjugated to methotrexate                                                                                                                 | NCT03175978                                              |
| Pevonedistat (MLN4924)                                                    | Small-molecule inhibitor of Nedd8-activating enzyme                                                                                              | NCT03268954<br>NCT03238248                               |
| Roxadustat (FG-4592)                                                      | HIF prolyl hydroxylase inhibitor                                                                                                                 | NCT03263091<br>NCT03303066                               |
| Nerofe                                                                    | Novel tumor cell apoptosis factor, binds T1/ST2 receptor and activates apoptosis                                                                 | NCT03059615                                              |
| VSV-hIFNbeta-NIS                                                          | Vesicular stomatitis virus carrying the human <i>NIS</i> and <i>IFNB</i> genes (VSV-hIFN-beta-NIS), which may preferentially target cancer cells | NCT03017820                                              |

(Table continued on next page)

**eTable.** (Continued) Emerging Therapies in Myelodysplastic Syndromes<sup>a</sup>

| Drug Classes and Drugs           | Mechanism of Action                        | Identifier  |
|----------------------------------|--------------------------------------------|-------------|
| <b>Miscellaneous (Continued)</b> |                                            |             |
| Veliparib (ABT-888)              | PARP-1/2 inhibitor                         | NCT03289910 |
| Imetelstat (JNJ-63935937)        | Competitive enzyme inhibitor of telomerase | NCT02598661 |
| Nandrolone decanoate             | Androgen therapy for telomeropathies       | NCT02055456 |

*Note:* The trials in this table include those identified on the clinicaltrials.gov website on September 27, 2017, with the search term “myelodysplastic syndrome”; the search was restricted to “Open” trials. Agents have been included if the study in which they were being tested was in either “Recruiting” or “Not Yet Recruiting” status and excluded if the study was “Completed,” “Unknown,” or “Terminated.” Agents also have been included if they were not already approved by the US Food and Drug Administration for myelodysplastic syndromes (lenalidomide, azacitidine, and decitabine), for acute myeloid leukemia, or for an iron chelation indication. Excluded agents are those for stem cell transplant conditioning, cellular product manipulation, and graft-versus-host disease prevention or treatment.

ATRA, all-trans-retinoic acid; AURKB, Aurora B kinase; BET, bromodomain and extraterminal; BTK, Bruton tyrosine kinase; CAR, chimeric antigen receptor; CDK9, cyclin-dependent kinase 9; CHK1, checkpoint kinase 1; CSF1R, colony-stimulating factor 1 receptor; CTLA-4, cytotoxic T-lymphocyte-associated antigen 4; CXCR4, C-X-C chemokine receptor type 4; EPO, erythropoietin; ERK, extracellular signal-regulated protein; FLT3, Fms-like tyrosine kinase 3; GDF, growth and differentiation factor; GTP, guanosine triphosphate; HSA, human serum albumin; HIF, hypoxia-inducible factor; Hsp90, heat shock protein 90; IDH, isocitrate dehydrogenase; IFN, interferon; IGF-1, insulin-like growth factor 1; IgG, immunoglobulin G; IL, interleukin; IL3RA, interleukin 3 receptor subunit alpha; JAK, Janus-associated kinase; KIRs, killer cell immunoglobulin-like receptors; LSD1, lysine-specific histone demethylase 1; MAPK, mitogen-activated protein; MELK, maternal embryonic leucine zipper kinase; mTOR, mammalian target of rapamycin; NIS, sodium iodide symporter; NK, natural killer; PARP, poly(ADP-ribose) polymerase; PD-1, programmed death 1; PD-L1, programmed death 1–ligand 1; PDGFR, platelet-derived growth factor receptor; PEG, polyethylene glycol; PI3K, phosphoinositide-3 kinase; PLK4, polo-like kinase 4; sEphB4, soluble extracellular domain of EphB4; SINE, selective inhibitor of nuclear export; TGFBR1, transforming growth factor beta receptor 1; TIM-3, T-cell immunoglobulin and mucin domain-containing protein 3; TPO, thrombopoietin; VEGFR, vascular endothelial growth factor receptor.

<sup>a</sup> Updated and based in part on Bejar R, Steensma DP. Recent developments in myelodysplastic syndromes. *Blood*. 2014;124(18):2793-2803.
